# Supplementary material for: The dolabellane diterpenes as potential inhibitors of the SARS-CoV-2 main protease: molecular insight of the inhibitory mechanism through computational studies
Source: Royal Society of Chemistry journal article supplement (doi:10.1039/d1ra07584e), 2021-01-01
Supplement: d1ra07584e1.pdf [file d1ra07584e1.pdf]

## Supplementary materials

### The Dolabellane Diterpenes as Potential Inhibitors of SARS-CoV-2

#### Main Protease: Molecular Insight of Inhibitory Mechanism through Computational Studies

Nanik Siti Aminah<sup>a,b\*</sup>, Muhammad Ikhlas Abdjan<sup>a,c</sup>, Andika Pramudya Wardana<sup>a,c</sup>, Alfinda Novi  
Kristanti<sup>a,b</sup>, Imam Siswanto<sup>a,d</sup>, Khusna Arif Rakhman<sup>e</sup>, Yoshiaki Takaya<sup>f</sup>

<sup>a</sup> Departement of Chemistry, Faculty of Science and Technology, Universitas Airlangga, Surabaya  
60115, Indonesia. E-mail: nanik-s-a@fst.unair.ac.id

<sup>b</sup> Biotechnology of Tropical Medicinal Plants Research Group, Universitas Airlangga

<sup>c</sup> Ph.D. Student of Mathematics and Natural Sciences, Faculty of Science and Technology,  
Universitas Airlangga, Komplek Kampus C UNAIR, Jl. Mulyorejo, 60115, Surabaya, Indonesia

<sup>d</sup> Bioinformatic Laboratory, UCoE Research Center for Bio-Molecule Engineering Universitas  
Airlangga, Surabaya, Indonesia

<sup>e</sup> Departement of Chemistry Education, Universitas Khairun, Ternate,

<sup>f</sup> Faculty of Pharmacy, Meijo University, Nagoya, Japan

Table S1 Molecular Docking Results: Energy Components (kcal/mol) of the Inhibitor-3CL<sup>pro</sup>

| Code                    | Grid Score | E <sub>vdW</sub> | E <sub>ele</sub> |
|-------------------------|------------|------------------|------------------|
| 0EN-3CL <sup>pro</sup>  | -72.58     | -66.28           | -6.30            |
| DD1-3CL <sup>pro</sup>  | -41.39     | -40.00           | -1.39            |
| DD2-3CL <sup>pro</sup>  | -41.20     | -41.33           | 0.13             |
| DD3-3CL <sup>pro</sup>  | -47.71     | -47.43           | -0.28            |
| DD4-3CL <sup>pro</sup>  | -37.81     | -35.55           | -2.25            |
| DD5-3CL <sup>pro</sup>  | -42.93     | -41.86           | -1.07            |
| DD6-3CL <sup>pro</sup>  | -48.50     | -46.69           | -1.80            |
| DD7-3CL <sup>pro</sup>  | -45.74     | -45.84           | 0.09             |
| DD8-3CL <sup>pro</sup>  | -47.62     | -47.09           | -0.53            |
| DD9-3CL <sup>pro</sup>  | -72.66     | -72.09           | -0.57            |
| DD10-3CL <sup>pro</sup> | -67.95     | -69.34           | 1.39             |
| DD11-3CL <sup>pro</sup> | -68.58     | -67.34           | -1.24            |
| DD12-3CL <sup>pro</sup> | -65.67     | -64.32           | -1.35            |
| DD13-3CL <sup>pro</sup> | -74.53     | -70.60           | -3.93            |
| DD14-3CL <sup>pro</sup> | -65.68     | -65.58           | -0.09            |

Table S2 The average value of trajectories during the simulation time. Data are shown as mean  $\pm$  standard deviation (SD).

| Parameters                          | 3CL <sup>pro</sup>   | 0EN-3CL <sup>pro</sup> | DD9-3CL <sup>pro</sup> | DD13-3CL <sup>pro</sup> |
|-------------------------------------|----------------------|------------------------|------------------------|-------------------------|
| <b>100 ns</b>                       |                      |                        |                        |                         |
| Total Energy (kcal/mol)             | -111568 $\pm$ 984.48 | -111413 $\pm$ 976.49   | -110988 $\pm$ 984.74   | -111077 $\pm$ 987.73    |
| RMSD-Complex (nm)                   | 0.25 $\pm$ 0.04      | 0.26 $\pm$ 0.04        | 0.26 $\pm$ 0.04        | 0.27 $\pm$ 0.04         |
| RMSD-Backbone (nm)                  | 0.19 $\pm$ 0.04      | 0.20 $\pm$ 0.05        | 0.18 $\pm$ 0.03        | 0.20 $\pm$ 0.05         |
| RMSD-Ligand (nm)                    | -                    | 0.16 $\pm$ 0.03        | 0.24 $\pm$ 0.03        | 0.22 $\pm$ 0.03         |
| <b>Last 20 ns</b>                   |                      |                        |                        |                         |
| RMSF (nm)                           | 0.32 $\pm$ 0.10      | 0.45 $\pm$ 0.15        | 0.39 $\pm$ 0.13        | 0.53 $\pm$ 0.20         |
| B-Factor (nm <sup>2</sup> )         | 3.09 $\pm$ 1.85      | 5.92 $\pm$ 3.61        | 4.51 $\pm$ 2.90        | 8.65 $\pm$ 5.84         |
| RoG (nm)                            | 2.23 $\pm$ 0.01      | 2.20 $\pm$ 0.00        | 2.22 $\pm$ 0.01        | 2.23 $\pm$ 0.01         |
| SASA-All Surface(nm <sup>2</sup> )  | 146.32 $\pm$ 2.62    | 142.08 $\pm$ 2.54      | 147.45 $\pm$ 3.14      | 143.73 $\pm$ 2.84       |
| SASA-Active Site (nm <sup>2</sup> ) | 10.85 $\pm$ 0.78     | 9.98 $\pm$ 0.79        | 16.20 $\pm$ 0.82       | 11.61 $\pm$ 0.62        |
| Atom Contacts                       | -                    | 8.00 $\pm$ 2.00        | 2.00 $\pm$ 1.00        | 8.00 $\pm$ 2.00         |

Table S3 Atom contacts detail of the inhibitor-3CL<sup>pro</sup>: The percentage of atom contacts ( $P_{AC}$ ) and distance average (Avg).

| No                            | Contact           | Frames | Fraction | Avg (Å) | $P_{AC}$ (%) |
|-------------------------------|-------------------|--------|----------|---------|--------------|
| <b>OEN-3CL<sup>pro</sup></b>  |                   |        |          |         |              |
| 1                             | N3...NE2(HIE163)  | 1978   | 0.99     | 3.04    | 98.90        |
| 2                             | O2...N(GLU166)    | 1944   | 0.97     | 2.91    | 97.20        |
| 3                             | O1...N(GLY143)    | 1873   | 0.94     | 3.04    | 93.65        |
| 4                             | C21...O(LEU141)   | 1698   | 0.85     | 3.19    | 84.90        |
| 5                             | O1...CA(ASN142)   | 1581   | 0.79     | 3.28    | 79.05        |
| 6                             | O1...ND2(ASN142)  | 1261   | 0.63     | 2.99    | 63.05        |
| 7                             | N3...CE1(HIE163)  | 1018   | 0.51     | 3.34    | 50.90        |
| 8                             | C20...O(LEU141)   | 971    | 0.49     | 3.31    | 48.55        |
| 9                             | O1...CB(ASN142)   | 938    | 0.47     | 3.32    | 46.90        |
| 10                            | C20...C(LEU141)   | 881    | 0.44     | 3.36    | 44.05        |
| 11                            | C19...ND2(ASN142) | 611    | 0.31     | 3.33    | 30.55        |
| 12                            | C20...OE1(GLU166) | 366    | 0.18     | 3.33    | 18.30        |
| 13                            | C21...C(LEU141)   | 353    | 0.18     | 3.40    | 17.65        |
| 14                            | C20...N(ASN142)   | 332    | 0.17     | 3.39    | 16.60        |
| 15                            | O1...CG(ASN142)   | 324    | 0.16     | 3.38    | 16.20        |
| 16                            | C20...CD(GLU166)  | 23     | 0.01     | 3.43    | 1.15         |
| <b>DD9-3CL<sup>pro</sup></b>  |                   |        |          |         |              |
| 1                             | O30...N(THR26)    | 1921   | 0.96     | 3.00    | 96.05        |
| 2                             | O30...CA(THR25)   | 1163   | 0.58     | 3.34    | 58.15        |
| 3                             | O30...O(THR26)    | 872    | 0.44     | 3.31    | 43.60        |
| 4                             | C49...C(THR45)    | 485    | 0.24     | 3.39    | 24.25        |
| 5                             | O30...C(THR25)    | 238    | 0.12     | 3.44    | 11.90        |
| 6                             | C52...O(THR24)    | 167    | 0.08     | 3.36    | 8.35         |
| 7                             | C44...CA(THR45)   | 41     | 0.02     | 3.43    | 2.05         |
| 8                             | C45...CB(THR45)   | 16     | 0.01     | 3.44    | 0.80         |
| 9                             | C24...ND2(ASN142) | 3      | 0.00     | 3.37    | 0.15         |
| <b>DD13-3CL<sup>pro</sup></b> |                   |        |          |         |              |
| 1                             | O30...NE2(GLN189) | 1977   | 0.99     | 2.94    | 98.85        |
| 2                             | O15...CD2 (HIE41) | 1915   | 0.96     | 3.14    | 95.75        |
| 3                             | N59...OG(SER144)  | 1877   | 0.94     | 3.10    | 93.85        |
| 4                             | N59...NE2(HIE163) | 1849   | 0.92     | 3.09    | 92.45        |
| 5                             | O25...ND2(ASN142) | 1387   | 0.69     | 3.00    | 69.35        |
| 6                             | O54...O(HIE164)   | 785    | 0.39     | 3.28    | 39.25        |
| 7                             | N59...O(LEU141)   | 725    | 0.36     | 3.31    | 36.25        |
| 8                             | C60...NE2(HIE163) | 678    | 0.34     | 3.39    | 33.90        |
| 9                             | C44...O(GLN189)   | 642    | 0.32     | 3.30    | 32.10        |
| 10                            | O15...CG(GLN189)  | 633    | 0.32     | 3.36    | 31.65        |
| 11                            | C58...O(LEU141)   | 569    | 0.28     | 3.32    | 28.45        |
| 12                            | C14...CG(GLN189)  | 510    | 0.26     | 3.42    | 25.50        |
| 13                            | C53...O(HIE164)   | 491    | 0.25     | 3.32    | 24.55        |
| 14                            | O25...OD1(ASN142) | 346    | 0.17     | 3.31    | 17.30        |
| 15                            | C49...O(GLU166)   | 337    | 0.17     | 3.34    | 16.85        |
| 16                            | O25...CG(ASN142)  | 312    | 0.16     | 3.34    | 15.60        |
| 17                            | C31...O(CYS44)    | 218    | 0.11     | 3.38    | 10.90        |
| 18                            | C31...CG2(THR25)  | 196    | 0.10     | 3.41    | 9.80         |
| 19                            | C37...SD(MET49)   | 26     | 0.01     | 3.41    | 1.30         |
| 20                            | C58...NE2(HIE163) | 5      | 0.00     | 3.47    | 0.25         |

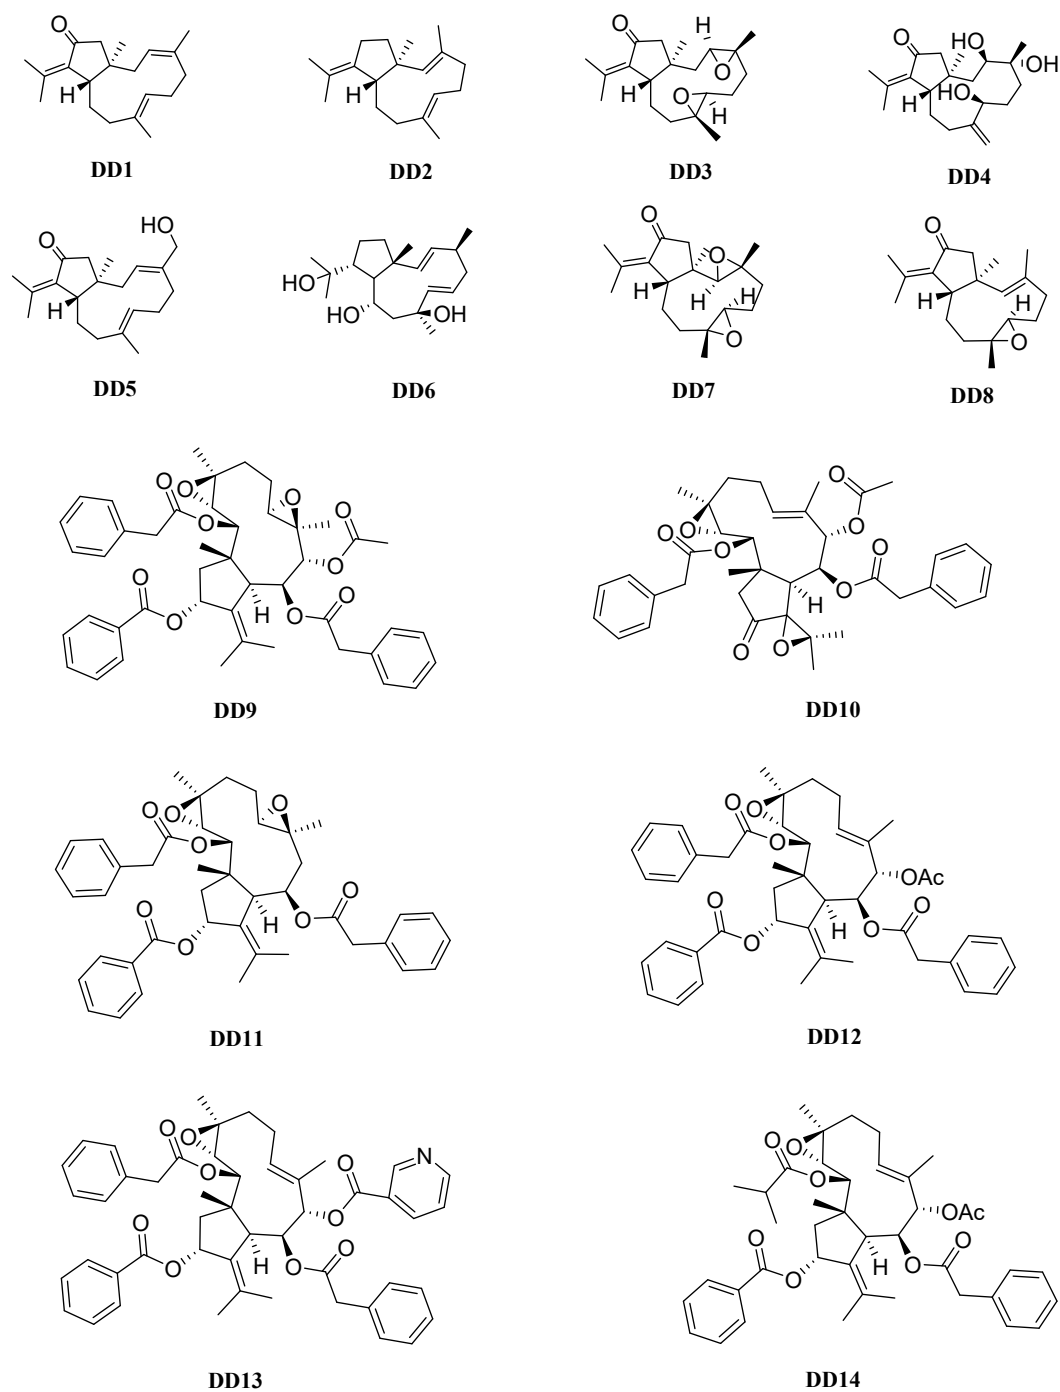

Fig. S1 Dolabellane diterpene as candidate

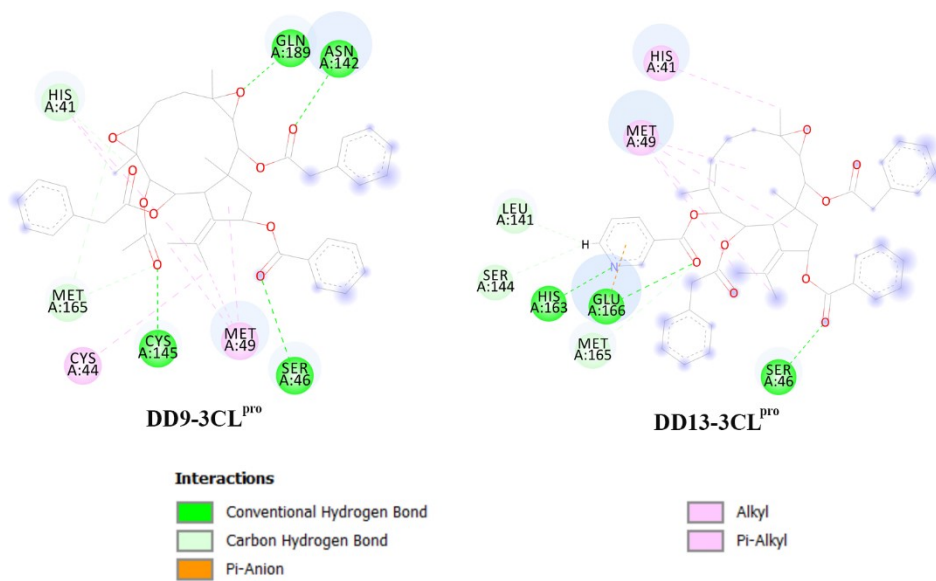

Fig. S2 Selected candidates based on lower grid-score: The interaction types of inhibitor-3CL<sup>pro</sup> shows in the 2D diagram.

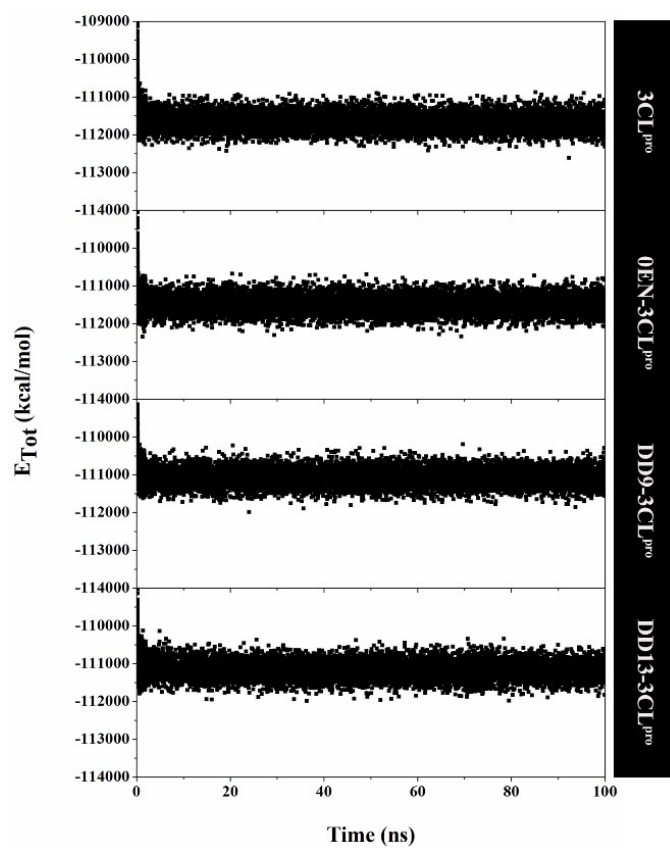

Fig. S3 The total energy was plotted along 100 ns of MD simulation of each system using the *mdout* analysis.

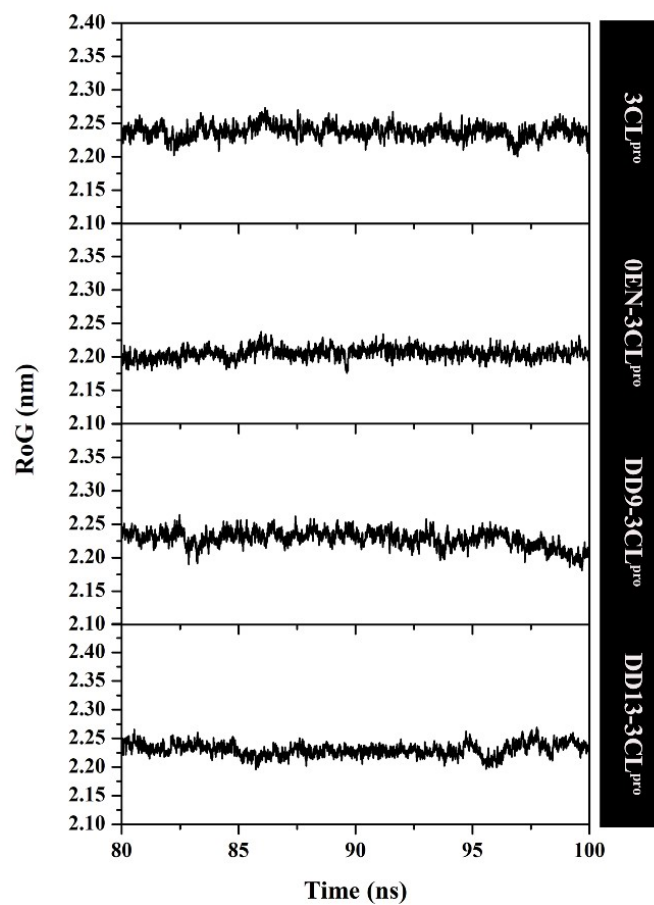

Fig. S4 The radius of gyration of each system was plotted along the last 20 ns of MD simulation.



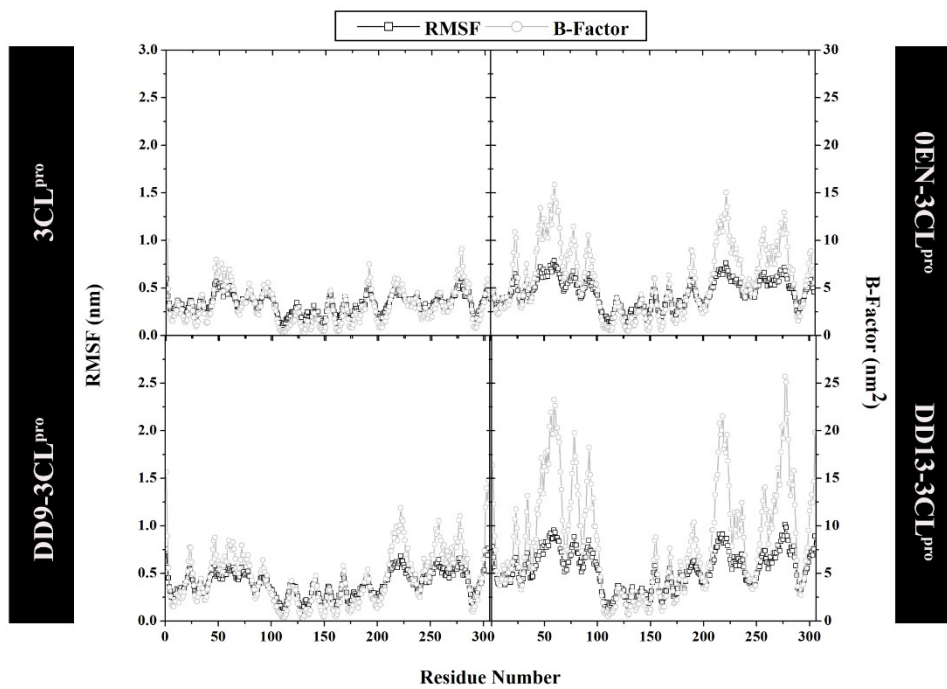

Fig. S5 Flexibility Analysis: The root-mean-square fluctuation and B-factor plotted along the last 20 ns of MD simulation.

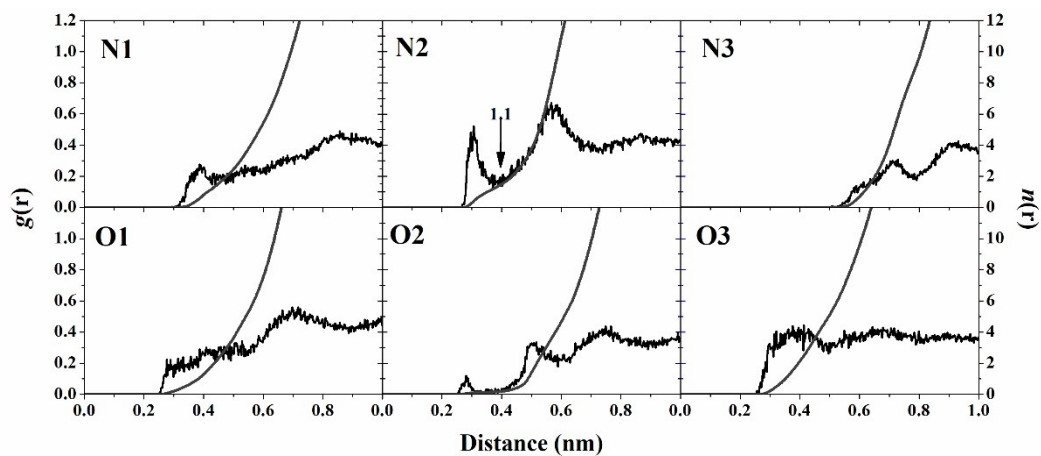

Fig. S6 The radial distribution functions ( $g(r)$ ) of the water oxygen atom and integration numbers ( $n(r)$ ), up to the first minimum around the heteroatoms (black arrow) of 0EN-3CL<sup>PRO</sup> during the simulation over the last 20 ns.

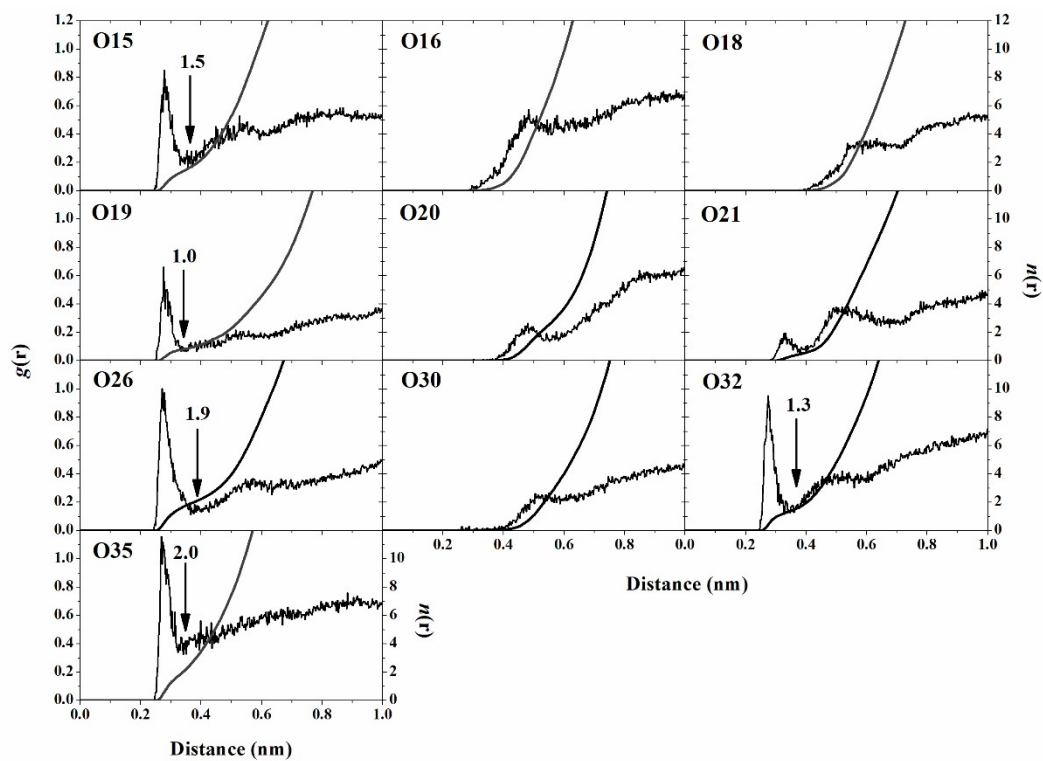

Fig. S7 The radial distribution functions ( $g(r)$ ) of the water oxygen atom and integration numbers ( $n(r)$ ), up to the first minimum around the heteroatoms (black arrow) of DD9-3CL<sup>PRO</sup> during the simulation over the last 20 ns.

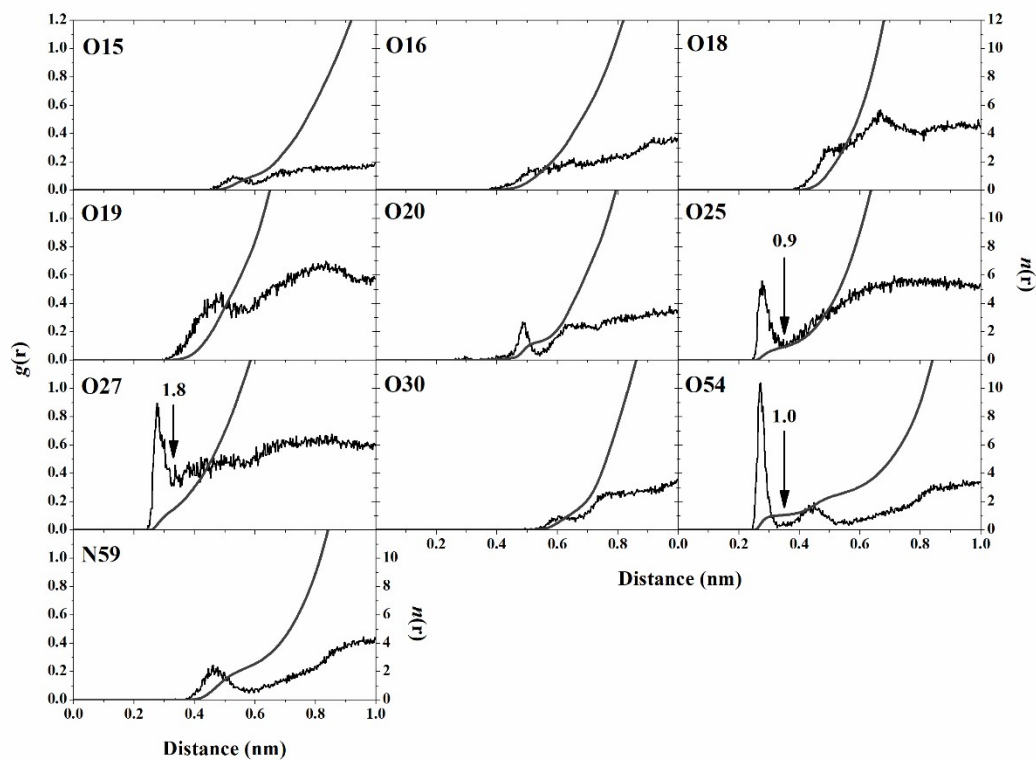

Fig. S8 The radial distribution functions ( $g(r)$ ) of the water oxygen atom and integration numbers ( $n(r)$ ), up to the first minimum around the heteroatoms (black arrow) of DD13-3CL<sup>PRO</sup> during the simulation over the last 20 ns.

| Residues | Subsite | 0EN-3CL <sup>pro</sup> | DD9-3CL <sup>pro</sup> | DD13-3CL <sup>pro</sup> |
|----------|---------|------------------------|------------------------|-------------------------|
| THR25    | S2'     | -0.20                  | -2.54                  | -1.01                   |
| THR26    | S2'     | -0.13                  | -1.62                  | -0.22                   |
| LEU27    | S2'     | -0.63                  | -1.02                  | -0.92                   |
| HIE41    | S2      | -1.33                  | -1.38                  | -2.68                   |
| CYS44    | S2      | -0.16                  | -1.08                  | -1.09                   |
| THR45    | S2      | -0.04                  | -1.35                  | -0.87                   |
| SER46    | S2      | -0.06                  | -1.73                  | -1.36                   |
| MET49    | S2      | -1.89                  | -3.13                  | -3.09                   |
| TYR54    | S2      | -0.66                  | -0.07                  | -0.13                   |
| LEU141   | S1      | -0.89                  | -0.14                  | -0.83                   |
| ASN142   | S1      | -2.08                  | -1.43                  | -2.85                   |
| GLY143   | S1      | -0.88                  | -1.01                  | -0.39                   |
| SER144   | S1      | -0.66                  | -0.12                  | -0.58                   |
| CYS145   | S1      | -1.41                  | -0.18                  | -1.42                   |
| HIE163   | S1      | -0.34                  | -0.03                  | -0.55                   |
| HIE164   | S2      | -0.81                  | -0.04                  | -1.60                   |
| MET165   | S2      | -2.76                  | -0.03                  | -2.77                   |
| GLU166   | S3      | -2.24                  | -0.04                  | -2.50                   |
| LEU167   | S4      | -0.25                  | -0.01                  | -0.32                   |
| HIE172   | S1      | -0.79                  | -0.01                  | -0.44                   |
| ASP187   | S2      | -0.79                  | 0.00                   | -0.33                   |
| ARG188   | S2      | -0.67                  | -0.01                  | -0.56                   |
| GLN189   | S4      | -1.07                  | -0.05                  | -3.31                   |

Fig. S9 The van der Waals contact of each complex in the 3CL<sup>pro</sup> subsite binding pocket plotted along 20 ns last trajectories.
